# Supplementary material for: Proanthocyanidin-enhanced wettability and adhesion in liquid metal inks for multi-substrate patterning in soft electronics
Source: Royal Society of Chemistry journal article supplement (doi:10.1039/d4ta07147f), 2024-11-30
Supplement: d4ta07147f1.pdf [file d4ta07147f1.pdf]

## **Proanthocyanidin-Enhanced Wettability and Adhesion in Liquid Metal Inks for Multi-Substrate Patterning in Soft Electronics**

Haoran Liu<sup>1</sup>, Yidong Peng<sup>1</sup>, Jiahui Sun<sup>1</sup>, Yuxi Zhang<sup>1</sup>, Jiayan Long<sup>1</sup>, Yanqing Gu<sup>2</sup>, Steve Park<sup>3</sup>, Tianxi Liu<sup>1</sup>, Jiancheng Dong<sup>1,\*</sup>, Yunpeng Huang<sup>1,4,\*</sup>

<sup>1</sup> Key Laboratory of Synthetic and Biological Colloids, Ministry of Education, School of Chemical and Material Engineering, Jiangnan University, Wuxi, 214122, China

<sup>2</sup> Department of Orthopedics, Nanjing First Hospital, Nanjing Medical University, Nanjing, Jiangsu, China

<sup>3</sup> Department of Materials Science and Engineering, Korea Advanced Institute of Science and Technology (KAIST), 291 Daehak-ro, Yuseong-gu, Daejeon, 34141, Republic of Korea

<sup>4</sup> State Key Laboratory of Organic-Inorganic Composites, Beijing University of Chemical Technology, Beijing 10029

\* Corresponding authors

E-mail: jesse\_D@outlook.com (J. C. Dong), hypjnu@jiangnan.edu.cn (Y. P. Huang)

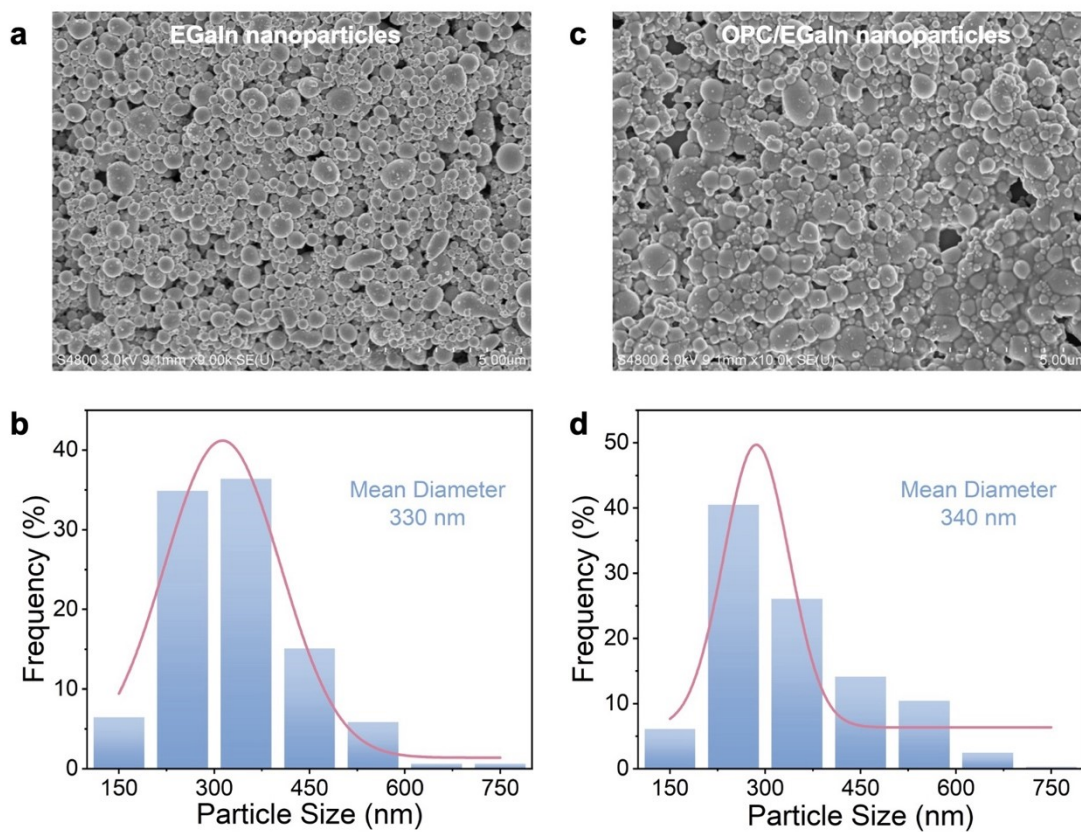

**Figure S1.** SEM images and corresponding particle size distribution of a, b) EGaIn nanoparticles, and c, d) OPC/EGaIn nanoparticles.

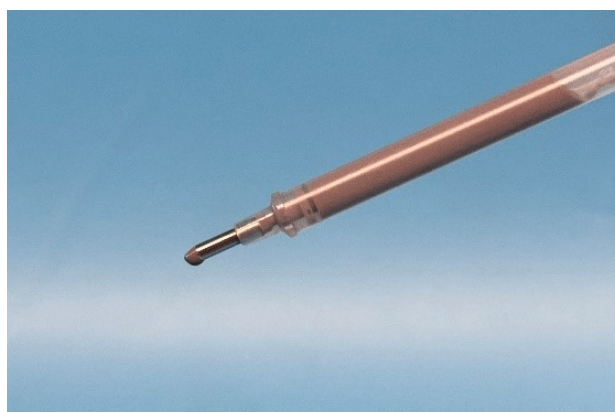

**Figure S2.** Digital photo showing the leakage of EGaIn nanoparticle inks in a ballpoint pen tube.

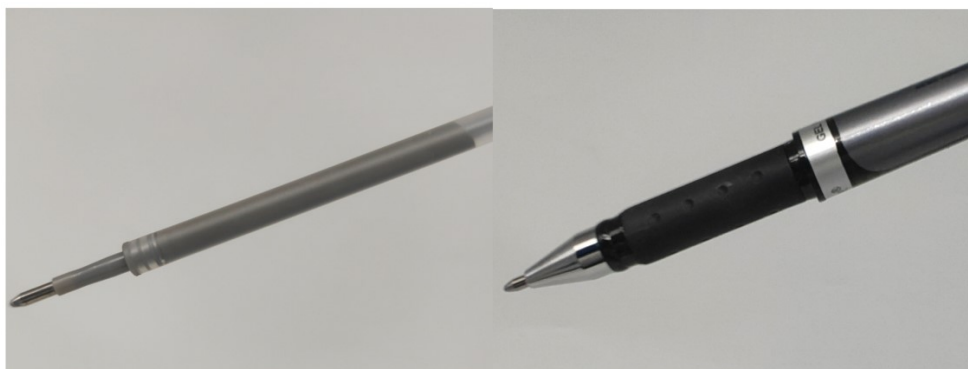

**Figure S3.** Digital photo of a ballpoint pen filled with OPC/EGaIn NPs inks.

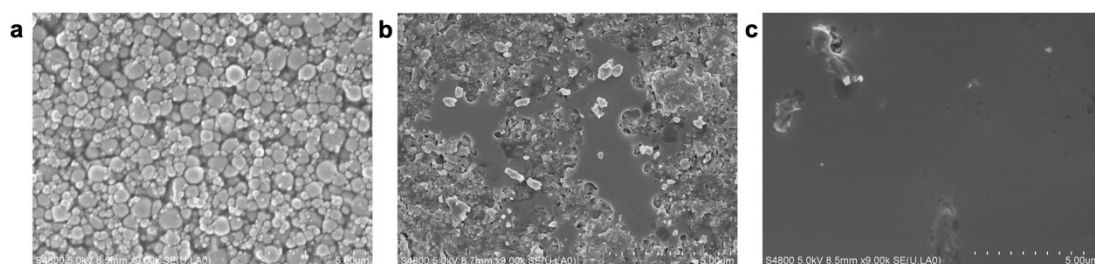

**Figure S4.** SEM images showing the activation process of the OPC/EGaIn NPs inks via the roller extrusion a) initial state, b) break and gradually fusing, c) conducting state.

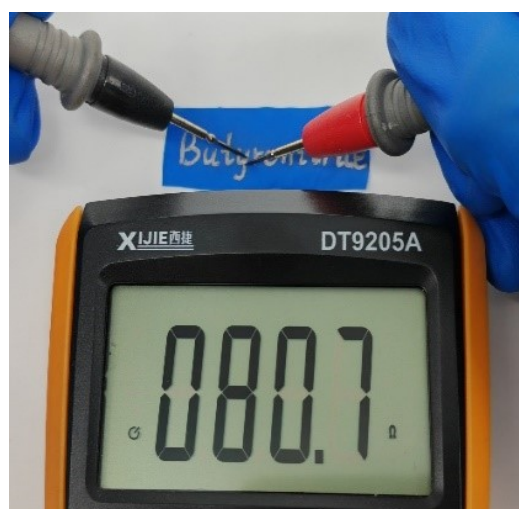

**Figure S5.** Digital photo showing the handwriting traces after activation.

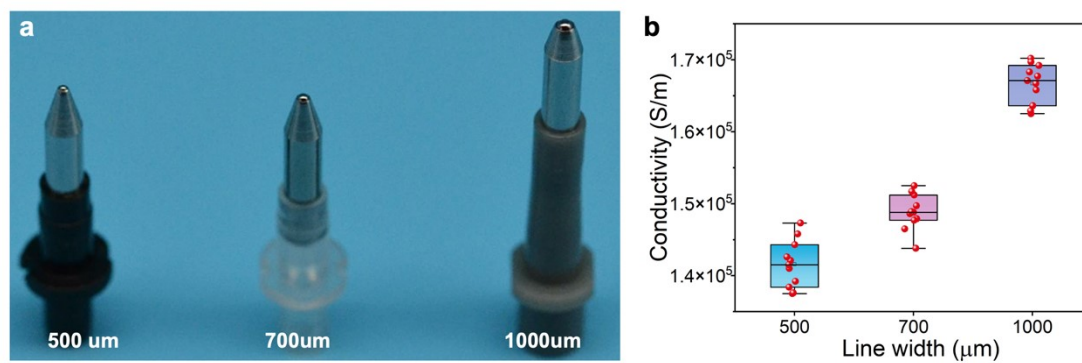

**Figure S6.** a) Digital photos of ballpoint pens with different diameters, and b) the electrical conductivity of handwritten inks corresponding to different line widths.

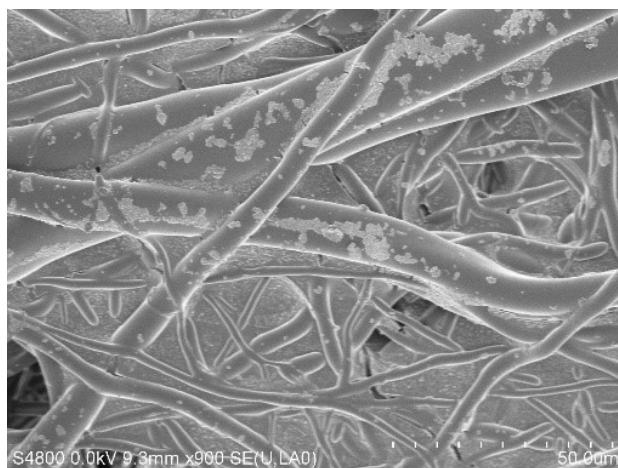

**Figure S7.** SEM image of OPC/EGaIn NPs ink printed SEBS membrane.

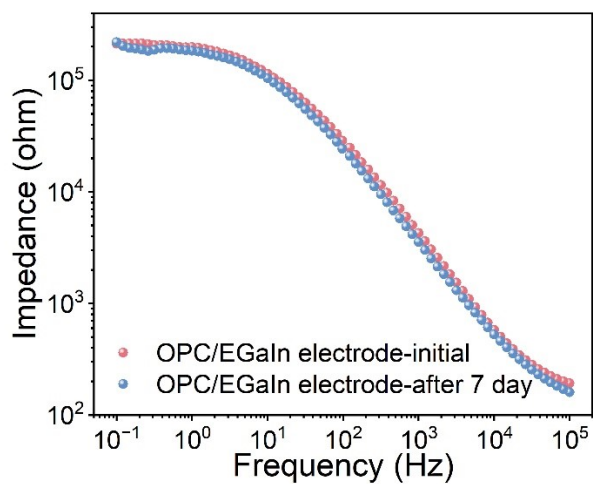

**Figure S8.** On-skin impedance of OPC/EGaIn bioelectrode after 7 days.

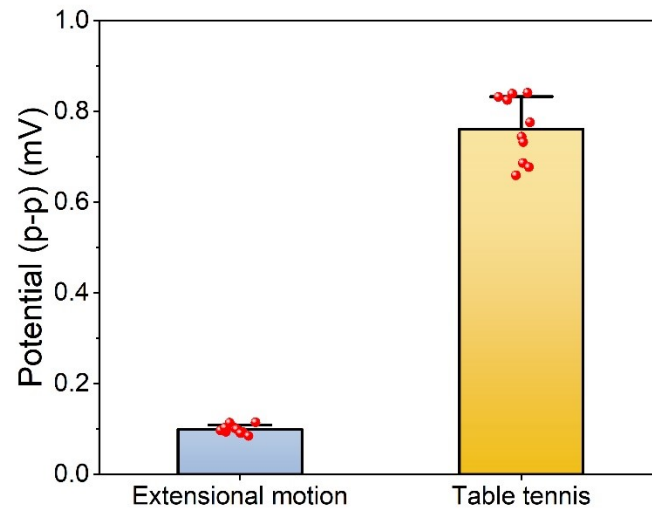

**Figure S9.** The potential of sEMG signals collected from different sports.
